# Supplementary material
Source: HighWire-hosted journal article supplement (https://erj.ersjournals.com/content/60/6/2102643)

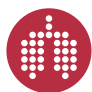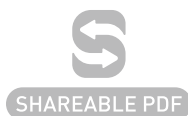

# Endothelial PHD2 deficiency induces nitrate stress *via* suppression of caveolin-1 in pulmonary hypertension

Bin Liu<sup>1,2</sup>, Yi Peng<sup>3,4,5</sup>, Dan Yi<sup>1,2</sup>, Narsa Machireddy<sup>3,4,5</sup>, Daoyin Dong<sup>3,4,5</sup>, Karina Ramirez<sup>1,2</sup>, Jingbo Dai<sup>3,4,5</sup>, Rebecca Vanderpool<sup>6</sup>, Maggie M. Zhu<sup>3,4,5</sup>, Zhiyu Dai<sup>1,2,10</sup> and You-Yang Zhao<sup>3,4,5,7,8,9,10</sup>

<sup>1</sup>Division of Pulmonary, Critical Care and Sleep, Dept of Internal Medicine, University of Arizona, Phoenix, AZ, USA. <sup>2</sup>Translational Cardiovascular Research Center, College of Medicine-Phoenix, University of Arizona, Phoenix, AZ, USA. <sup>3</sup>Program for Lung and Vascular Biology, Ann and Robert H. Lurie Children's Hospital of Chicago, Chicago, IL, USA. <sup>4</sup>Section for Injury Repair and Regeneration Research, Stanley Manne Children's Research Institute, Ann and Robert H. Lurie Children's Hospital of Chicago, Chicago, IL, USA. <sup>5</sup>Division of Critical Care, Dept of Pediatrics, Northwestern University Feinberg School of Medicine, Chicago, IL, USA. <sup>6</sup>College of Medicine Division of Cardiovascular Medicine, The Ohio State University, Columbus, OH, USA. <sup>7</sup>Dept of Pharmacology, Northwestern University Feinberg School of Medicine, Chicago, IL, USA. <sup>8</sup>Dept of Medicine, Northwestern University Feinberg School of Medicine, Chicago, IL, USA. <sup>9</sup>Feinberg Cardiovascular and Renal Research Institute, Northwestern University Feinberg School of Medicine, Chicago, IL, USA. <sup>10</sup>Zhiyu Dai and You-Yang Zhao contributed equally to this article as lead authors and supervised the work.

Corresponding author: You-Yang Zhao (Youyang.zhao@northwestern.edu)

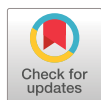

Shareable abstract (@ERSpublications)

**Endothelial PHD2 deficiency decreases caveolin-1 expression leading to augmented nitrate stress, which contributes to obliterative pulmonary vascular remodelling and severe pulmonary hypertension** <https://bit.ly/3yw48zm>

**Cite this article as:** Liu B, Peng Y, Yi D, et al. Endothelial PHD2 deficiency induces nitrate stress *via* suppression of caveolin-1 in pulmonary hypertension. *Eur Respir J* 2022; 60: 2102643 [DOI: 10.1183/13993003.02643-2021].

This single-page version can be shared freely online.

Copyright ©The authors 2022.

This version is distributed under the terms of the Creative Commons Attribution Non-Commercial Licence 4.0. For commercial reproduction rights and permissions contact [permissions@ersnet.org](mailto:permissions@ersnet.org)

This article has an editorial commentary:  
<https://doi.org/10.1183/13993003.01776-2022>

Received: 19 April 2020  
Accepted: 24 June 2022

## Abstract

**Background** Nitrate stress is a characteristic feature of the pathology of human pulmonary arterial hypertension. However, the role of nitrate stress in the pathogenesis of obliterative vascular remodelling and severe pulmonary arterial hypertension remains largely unclear.

**Method** Our recently identified novel mouse model (*Egln1*<sup>Tie2Cre</sup>, *Egln1* encoding prolyl hydroxylase 2 (PHD2)) has obliterative vascular remodelling and right heart failure, making it an excellent model to use in this study to examine the role of nitrate stress in obliterative vascular remodelling.

**Results** Nitrate stress was markedly elevated whereas endothelial caveolin-1 (Cav1) expression was suppressed in the lungs of *Egln1*<sup>Tie2Cre</sup> mice. Treatment with a superoxide dismutase mimetic, manganese (III) tetrakis (1-methyl-4-pyridyl) porphyrin pentachloride or endothelial *Nos3* knockdown using endothelial cell-targeted nanoparticle delivery of CRISPR-Cas9/guide RNA plasmid DNA inhibited obliterative pulmonary vascular remodelling and attenuated severe pulmonary hypertension in *Egln1*<sup>Tie2Cre</sup> mice. Genetic restoration of Cav1 expression in *Egln1*<sup>Tie2Cre</sup> mice normalised nitrate stress, reduced pulmonary hypertension and improved right heart function.

**Conclusion** These data suggest that suppression of Cav1 expression secondary to PHD2 deficiency augments nitrate stress through endothelial nitric oxide synthase activation, which contributes to obliterative vascular remodelling and severe pulmonary hypertension. Thus, a reactive oxygen/nitrogen species scavenger might have therapeutic potential for the inhibition of obliterative vascular remodelling and severe pulmonary arterial hypertension.

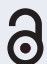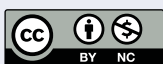

Supplement: inline-supplementary-material-4 [file inline-supplementary-material-4.pdf]
